# Supplementary material for: Highly dispersed Ru cluster-embedded nitrogen-doped hollow carbon spheres with tunable electronic properties for efficient catalytic reductive amination of biomass-derived furfural
Source: Royal Society of Chemistry journal article supplement (doi:10.1039/d5qi02342d), 2026-01-01
Supplement: d5qi02342d1.pdf [file d5qi02342d1.pdf]

## **Supporting Information**

# **Highly dispersed Ru clusters embedded nitrogen-doped hollow carbon spheres with tunable electronic property for catalytic reductive amination of biomass-derived furfural**

**Jun Wu,\* Gang Pan, Ming Jin, Jiahao Bai, Tailong Shi and Yong Li\***

School of Materials Science & Engineering, Shaanxi Key Laboratory of Green Preparation and Functionalization for Inorganic Materials, Shaanxi University of Science & Technology, Xi'an, 710021, P. R. China

**\* Corresponding authors.**

E-mail address: [wjhg168@163.com](mailto:wjhg168@163.com) (J. Wu); [yongli@sust.edu.cn](mailto:yongli@sust.edu.cn) (Y. Li).

## Table of Contents

|                                                                                                                                                  |    |
|--------------------------------------------------------------------------------------------------------------------------------------------------|----|
| <b>1. Materials and Methods</b> .....                                                                                                            | 3  |
| <b>1.1. Synthesis of Schiff base</b> .....                                                                                                       | 3  |
| <b>1.2. Synthesis of other catalysts</b> .....                                                                                                   | 3  |
| <b>2. Figures and Tables</b> .....                                                                                                               | 5  |
| <b>Fig. S1.</b> TEM images and the corresponding particle size distribution histogram of Ru@NHCS-600 catalyst.<br>.....                          | 5  |
| <b>Fig. S2.</b> TEM images and the corresponding particle size distribution histogram of Ru@NHCS-800 catalyst.<br>.....                          | 5  |
| <b>Fig. S3.</b> TEM images and the corresponding particle size distribution histogram of Ru@NHCS-900 catalyst.<br>.....                          | 5  |
| <b>Table S1.</b> Fitting results of high-resolution N 1s spectra of various Ru@NHCS and NHCS-700 catalysts. ...                                  | 6  |
| <b>Table S2.</b> Fitting results of high-resolution Ru 3p spectra of various Ru@NHCS catalysts.....                                              | 6  |
| <b>Table S3.</b> Ru@NHCS-700 catalyzed the reductive amination of furfural and Schiff base under different<br>reaction conditions. ....          | 7  |
| <b>Table S4.</b> Experimental data for calculating turnover frequency (TOF) and initial reaction rate (IRR) of<br>various Ru@NHCS catalysts..... | 7  |
| <b>Table S5.</b> The superior reductive amination performance of Ru@NHCS-700 compared to the reported<br>catalysts.....                          | 8  |
| <b>Table S6.</b> The H <sub>2</sub> desorption characteristics of various Ru@NHCS catalysts. ....                                                | 9  |
| <b>REFERENCES</b> .....                                                                                                                          | 10 |

## 1. Materials and Methods

### 1.1. Synthesis of Schiff base

Typically, 4 mmol of furfural and 4 mmol of furfurylamine were added to 10 mL of anhydrous methanol in a reactor. Replacement of air in the reactor by N<sub>2</sub> and then filling with 1 MPa N<sub>2</sub>, rapidly stirred at 90 °C for 6 h. After the reaction, the solution was purified via spin distillation to isolate the intermediate Schiff base, and its purity was analyzed by gas chromatography.

### 1.2. Synthesis of other catalysts

**NHCS-700 catalyst.** 0.1 g of PS nanospheres was dispersed in 50 mL of deionized water under ultrasonication for 30 min. The mixture was then stirred in an oil bath for 5 min at room temperature, followed by the slow addition of 0.1 g of C<sub>8</sub>H<sub>12</sub>ClNO<sub>2</sub>. After stirring for an additional 30 min, 0.30285 g of Tris and 62 µL of HCl were added to adjust the pH to 8.5. The resulting mixture was subsequently stirred for 22 h at room temperature. Finally, after centrifugal washing, drying, and sintering, the catalyst was obtained.

**Ru@AC-700 catalyst.** Adding 0.1 g of AC, 625 µL of Cl<sub>3</sub>H<sub>6</sub>ORu solution (10.859 mg mL<sup>-1</sup>), and 15 mL of deionized water to a round-bottom flask, the mixture was sonicated for 30 min and then stirred at 85 °C for 6 h. Subsequently, the samples were oven-dried at 60 °C overnight to obtain the catalyst precursor.

**Ru@NC-700 catalyst.** 0.1 g of C<sub>8</sub>H<sub>12</sub>ClNO<sub>2</sub> and 625 µL of Cl<sub>3</sub>H<sub>6</sub>O<sub>2</sub>Ru solution (10.859 mg mL<sup>-1</sup>) was dispersed in 50 mL of deionized water, stirring for 30 minutes. Then, 0.30285 g of Tris and 62 µL of HCl were added to adjust the pH to 8.5. The resulting mixture was subsequently stirred for 22 h at room temperature. Finally, after centrifugal washing, drying, and sintering, the catalyst was obtained.

**Ru@HCS-700 catalyst.** Adding 0.1 g of PS nanospheres, 0.1 mL of ammonia solution, 15 mL of deionized water and 35 mL of ethanol to a round-bottom flask, stirring for 10 minutes. Then, 0.1 g resorcinol, 0.2 mL formaldehyde solution (AR, 37%-40%) and 625 µL of Cl<sub>3</sub>H<sub>6</sub>O<sub>2</sub>Ru solution (10.859 mg mL<sup>-1</sup>) were added sequentially. The resulting mixture was subsequently stirred for 22 h at room temperature. Finally, after centrifugal washing, drying, and sintering, the catalyst was obtained.

**Pd@NHCS-700 and Pt@NHCS-700 catalysts.** 0.1 g of PS nanospheres was dispersed in 50 mL of deionized water under ultrasonication for 30 min. The mixture was then stirred in an oil bath for 5 min at

room temperature, followed by the slow addition of 0.1 g of  $\text{C}_8\text{H}_{12}\text{ClNO}_2$  and different metal precursors that maintaining identical theoretical metal loadings. After stirring for an additional 30 min, 0.30285 g of Tris and 62  $\mu\text{L}$  of HCl were added to adjust the pH to 8.5. The resulting mixture was subsequently stirred for 22 h at room temperature. Finally, after centrifugal washing, drying, and sintering, the catalyst was obtained.

## 2. Figures and Tables

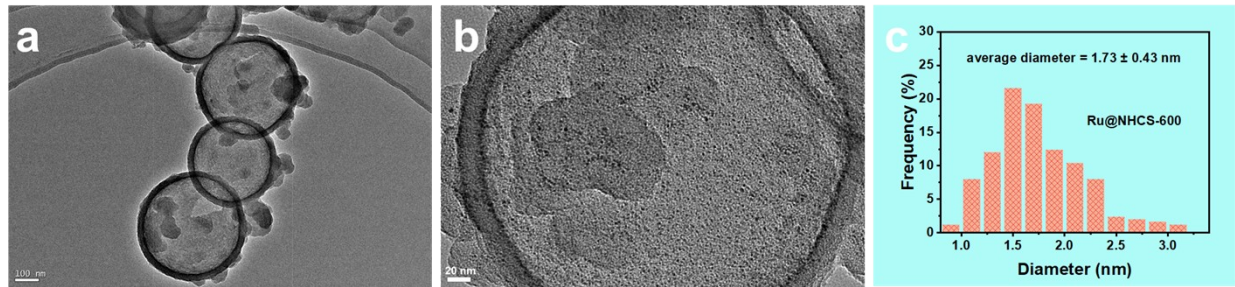

**Fig. S1.** TEM images and the corresponding particle size distribution histogram of Ru@NHCS-600 catalyst.

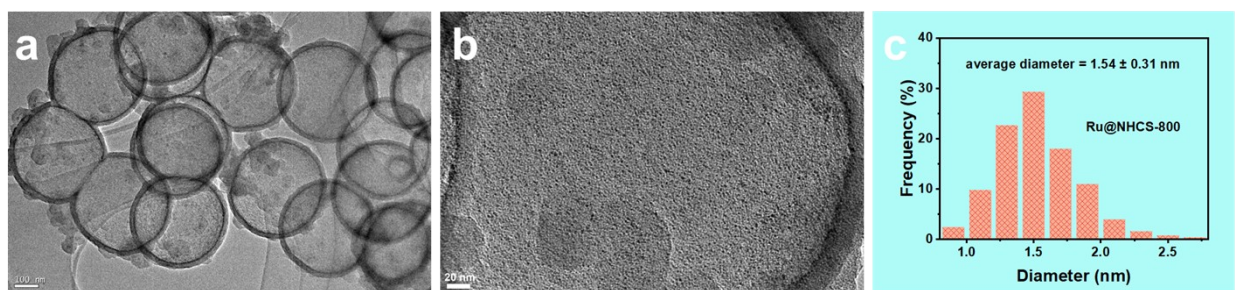

**Fig. S2.** TEM images and the corresponding particle size distribution histogram of Ru@NHCS-800 catalyst.

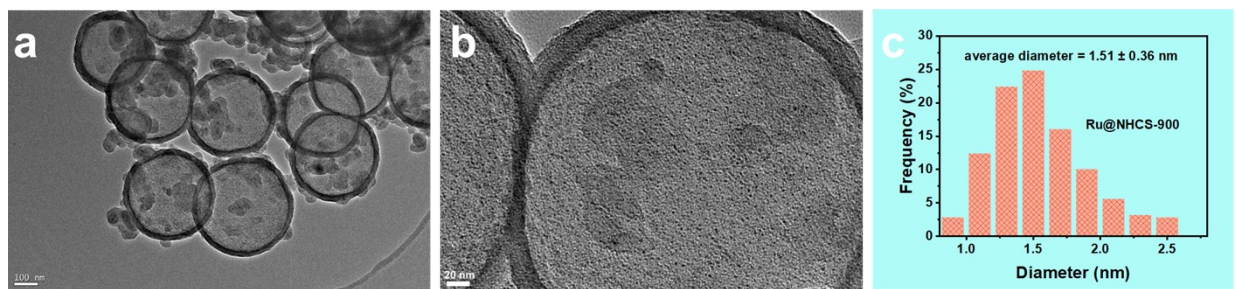

**Fig. S3.** TEM images and the corresponding particle size distribution histogram of Ru@NHCS-900 catalyst.

**Table S1.** Fitting results of high-resolution N 1s spectra of various Ru@NHCS and NHCS-700 catalysts.

| Catalyst    | Ru-N      |                      | pyridinic N |                      |
|-------------|-----------|----------------------|-------------|----------------------|
|             | peak (eV) | relative content (%) | peak (eV)   | relative content (%) |
| Ru@NHCS-600 | 399.44    | 12.5                 | 398.04      | 33.6                 |
| Ru@NHCS-700 | 399.66    | 16.3                 | 398.21      | 29.7                 |
| Ru@NHCS-800 | 399.58    | 14.6                 | 398.06      | 19.5                 |
| Ru@NHCS-900 | 399.31    | 11.9                 | 397.86      | 13.2                 |
| NHCS-700    | -         | -                    | 397.98      | 33.4                 |

**Table S2.** Fitting results of high-resolution Ru 3p spectra of various Ru@NHCS catalysts.

| Catalyst    | Ru <sup>0</sup> |                      |
|-------------|-----------------|----------------------|
|             | Peak (eV)       | Relative content (%) |
| Ru@NHCS-600 | 462.17          | 64.1                 |
| Ru@NHCS-700 | 461.73          | 69.4                 |
| Ru@NHCS-800 | 462.04          | 66.7                 |
| Ru@NHCS-900 | 462.30          | 57.8                 |

**Table S3.** Ru@NHCS-700 catalyzed the reductive amination of furfural and Schiff base under different reaction conditions.

| Entry | Substrate<br>(0.5 mmol) | NH <sub>3</sub> ·H <sub>2</sub> O<br>(mL) | Atmosphere<br>(0.5 MPa) | Conversion<br>(%) | Selectivity (%) |     |     |                  |
|-------|-------------------------|-------------------------------------------|-------------------------|-------------------|-----------------|-----|-----|------------------|
|       |                         |                                           |                         |                   | FUA             | FDA | FUI | Other            |
| 1     | Furfural                | 1.5                                       | N <sub>2</sub>          | 86                | -               | -   | 24  | 76 <sup>b</sup>  |
| 2     | Furfural                | 0                                         | H <sub>2</sub>          | 6                 | -               | -   | -   | 100 <sup>c</sup> |
| 3     | Schiff base             | 1.5                                       | N <sub>2</sub>          | 0                 | -               | /   | -   | -                |
| 4     | Schiff base             | 0                                         | H <sub>2</sub>          | 41                | -               | /   | -   | 100 <sup>d</sup> |

<sup>a</sup> Reaction conditions: methanol (5 mL), NH<sub>3</sub>·H<sub>2</sub>O (25-28%), Ru@NHCS-700 catalyst (10 mg), 80 °C, 3 h. <sup>b</sup> hydrofuranamide, <sup>c</sup> furfuryl alcohol, <sup>d</sup> secondary amine.

**Table S4.** Experimental data for calculating turnover frequency (TOF) and initial reaction rate (IRR) of various Ru@NHCS catalysts.

| Catalyst    | Time | Conversion | TOF                | IRR                                                   |
|-------------|------|------------|--------------------|-------------------------------------------------------|
|             | (h)  | (%)        | (h <sup>-1</sup> ) | (mmol g <sub>Ru</sub> <sup>-1</sup> h <sup>-1</sup> ) |
| Ru@NHCS-600 | 1    | 24.4       | 164.6              | 1628.8                                                |
| Ru@NHCS-700 | 0.33 | 24.5       | 378.6              | 3745.8                                                |
| Ru@NHCS-800 | 1    | 28.0       | 215.6              | 2132.8                                                |
| Ru@NHCS-900 | 1    | 19.7       | 133.8              | 1323.4                                                |

Reaction conditions: catalyst (10 mg), Schiff bases (0.25 mmol), ethanol (5 mL), NH<sub>3</sub>·H<sub>2</sub>O (1.5 mL, 25-28%), H<sub>2</sub> (0.5 MPa), 80 °C.

**Table S5.** The superior performance of Ru@NHCS-700 compared to the reported catalysts.

| Entry | Catalyst                                            | Metal/Substrate<br>(mole ratio) | H <sub>2</sub><br>(MPa) | Nitrogen<br>source/Substrate<br>(mole ratio)          | Tem.<br>(°C) | Time<br>(h) | Yield<br>(%) | Production rate<br>(mol <sub>FUA</sub> mol <sub>metal</sub> <sup>-1</sup> h <sup>-1</sup> ) | Ref.      |
|-------|-----------------------------------------------------|---------------------------------|-------------------------|-------------------------------------------------------|--------------|-------------|--------------|---------------------------------------------------------------------------------------------|-----------|
| 1     | Ru@NHCS-700                                         | 1:903                           | 0.5                     | NH <sub>3</sub> ·H <sub>2</sub> O (42:1)              | 80           | 3           | 100          | 199                                                                                         | This work |
| 2     | Ru/SiO <sub>2</sub>                                 | 1:670                           | 5.2                     | NH <sub>3</sub> ·H <sub>2</sub> O (5:1)               | 130          | 4           | 90           | 151                                                                                         | 1         |
| 3     | Ru/MMT                                              | 1:84                            | 1                       | NH <sub>3</sub> ·H <sub>2</sub> O (107:1)             | 90           | 3           | 89           | 25                                                                                          | 2         |
| 4     | Ru/BN-e                                             | 1:11                            | 1.5                     | NH <sub>3</sub> ·H <sub>2</sub> O (28:1)              | 90           | 5           | 99           | 33                                                                                          | 3         |
| 5     | 4Ru1Co/AC                                           | 1:39                            | 2                       | NH <sub>3</sub> ·H <sub>2</sub> O (51:1)              | 80           | 1           | 92           | 37                                                                                          | 4         |
| 6     | Ru/BNC                                              | 1:91                            | 2                       | N <sub>2</sub> H <sub>4</sub> ·H <sub>2</sub> O (4:1) | 80           | 16          | 99           | 6                                                                                           | 5         |
| 7     | Ru-NPs                                              | 1:253                           | 2                       | NH <sub>3</sub> (16:1)                                | 90           | 2           | 99           | 125                                                                                         | 6         |
| 8     | Ru1/NC                                              | 1:400                           | 2                       | NH <sub>3</sub> (0.5 MPa)                             | 100          | 10          | 97           | 178                                                                                         | 7         |
| 9     | Ru/TiO <sub>2</sub>                                 | 1:167                           | 1                       | NH <sub>3</sub> (35:1)                                | 80           | 1           | 83           | 153                                                                                         | 8         |
| 10    | Ru/Nb <sub>2</sub> O <sub>5</sub>                   | 1:250                           | 2                       | NH <sub>3</sub> (0.1 MPa)                             | 90           | 4           | 99           | 129                                                                                         | 9         |
| 11    | Ru/HZSM-5(46)                                       | 1:27                            | 3                       | NH <sub>3</sub> (21:1)                                | 100          | 0.25        | 76           | 82                                                                                          | 10        |
| 12    | Ru/TiP-100                                          | 1:500                           | 1.7                     | NH <sub>3</sub> (0.3 MPa)                             | 30           | 24          | 91           | 19                                                                                          | 11        |
| 13    | Ru/T-ZrO <sub>2</sub>                               | 1:126                           | 2                       | NH <sub>3</sub> (44:1)                                | 80           | 2.5         | 99           | 23                                                                                          | 12        |
| 14    | Ru/Ni <sub>1</sub> MgAlO <sub>x</sub>               | 1:600                           | 2                       | NH <sub>3</sub> (3:1)                                 | 90           | 5           | 91.3         | 192                                                                                         | 13        |
| 15    | Ru/α-Al <sub>2</sub> O <sub>3</sub>                 | 1:35                            | 2                       | NH <sub>3</sub> (0.2 MPa)                             | 70           | 24          | 73.5         | 3                                                                                           | 14        |
| 16    | Ru/SBA-15                                           | 1:253                           | 4                       | NH <sub>3</sub> (0.2 MPa)                             | 90           | 2           | 99           | 126                                                                                         | 15        |
| 17    | Ru@NC-Al <sub>2</sub> O <sub>3</sub>                | 1:404                           | 2                       | NH <sub>3</sub> (42:1)                                | 100          | 3           | 90           | 133                                                                                         | 16        |
| 18    | Ru/NCB-600                                          | 1:202                           | 2                       | NH <sub>3</sub> (35:1)                                | 50           | 2           | 99           | 100                                                                                         | 17        |
| 19    | Ru/Nb <sub>2</sub> O <sub>5</sub> ·H <sub>2</sub> O | 1:253                           | 4                       | NH <sub>3</sub> (16:1)                                | 70           | 4           | 89           | 56                                                                                          | 18        |
| 20    | Rh/TiO <sub>2</sub>                                 | 1:497                           | 2                       | NH <sub>3</sub> ·H <sub>2</sub> O (144:1)             | 100          | 2           | 93           | 196                                                                                         | 19        |
| 21    | Pd/MoO <sub>3-x</sub>                               | 1:39                            | 2                       | NH <sub>3</sub> (37:1)                                | 80           | 4           | 84           | 8                                                                                           | 20        |
| 22    | Pd NPs                                              | 1:2.7                           | 0.1                     | NH <sub>3</sub> (4:1)                                 | 30           | 3           | 97           | 2                                                                                           | 21        |
| 23    | Ni-Al <sub>2</sub> O <sub>3</sub>                   | 1:12                            | 2                       | NH <sub>3</sub> (21:1)                                | 100          | 2           | 92           | 9                                                                                           | 22        |
| 24    | Ni/SiO <sub>2</sub> -I-DP                           | 1:19                            | 4                       | NH <sub>3</sub> (0.8 MPa)                             | 90           | 1.5         | 95           | 12                                                                                          | 23        |

Continued **Table S5**. The superior performance of Ru@NHCS-700 compared to the reported catalysts.

| Entry | Catalyst            | Metal/Substrate<br>(mole ratio) | H <sub>2</sub><br>(MPa) | Nitrogen<br>source/Substrate                    | Tem.<br>(°C) | Time<br>(h) | Yield<br>(%) | Production rate<br>(mol <sub>FUA</sub> mol <sub>metal</sub> <sup>-1</sup> h <sup>-1</sup> ) | Ref. |
|-------|---------------------|---------------------------------|-------------------------|-------------------------------------------------|--------------|-------------|--------------|---------------------------------------------------------------------------------------------|------|
| 25    | Raney Co            | 1:13                            | 1                       | NH <sub>3</sub> (0.1 MPa)                       | 120          | 2           | 98           | 11                                                                                          | 24   |
| 26    | Co@CoO <sub>x</sub> | 1.6:1                           | 3                       | N <sub>2</sub> H <sub>4</sub> ·H <sub>2</sub> O | 60           | 4           | 96           | 3                                                                                           | 25   |

**Table S6**. The H<sub>2</sub> desorption characteristics of various Ru@NHCS catalysts.

| Catalyst    | Peak temperature<br>(°C) | Amount<br>(μmol g <sup>-1</sup> ) |
|-------------|--------------------------|-----------------------------------|
| Ru@NHCS-600 | 336                      | 54.2                              |
| Ru@NHCS-700 | 329                      | 97.9                              |
| Ru@NHCS-800 | 366                      | 70.0                              |
| Ru@NHCS-900 | 374                      | 31.5                              |

All data determined by H<sub>2</sub>-TPD.

## REFERENCES

1. N. S. Gould, H. Landfield, B. Dinkelacker, C. Brady, X. Yang and B. Xu, Selectivity control in catalytic reductive amination of furfural to furfurylamine on supported catalysts, *ChemCatChem*, 2020, **12**, 2106-2115.
2. T. A. Gokhale, A. B. Raut and B. M. Bhanage, Comparative account of catalytic activity of Ru- and Ni-based nanocomposites towards reductive amination of biomass derived molecules, *Mol. Catal.*, 2021, **510**.
3. M. Gao, X. Jia, J. Ma, X. Fan, J. Gao and J. Xu, Self-regulated catalysis for the selective synthesis of primary amines from carbonyl compounds, *Green Chem.*, 2021, **23**, 7115-7121.
4. G. Le, L. Xie, Y. Wang and L. Dai, Efficient conversion of furfural to furfuralamine over 4Ru1Co/AC catalyst, *Appl. Catal. A Gen.*, 2022, **647**.
5. H. Zou and J. Chen, Efficient and selective approach to biomass-based amine by reductive amination of furfural using Ru catalyst, *Appl. Catal. B Environ. Energy*, 2022, **309**, 121262-121276.
6. D. Chandra, Y. Inoue, M. Sasase, M. Kitano, A. Bhaumik, K. Kamata, H. Hosono and M. Hara, A high performance catalyst of shape-specific ruthenium nanoparticles for production of primary amines by reductive amination of carbonyl compounds, *Chem. Sci.*, 2018, **9**, 5949-5956.
7. H. Qi, J. Yang, F. Liu, L. Zhang, J. Yang, X. Liu, L. Li, Y. Su, Y. Liu, R. Hao, A. Wang and T. Zhang, Highly selective and robust single-atom catalyst Ru1/NC for reductive amination of aldehydes/ketones, *Nat. Commun.*, 2021, **12**, 3295-3312.
8. K. Han, S. Song, Y. You, X. Fu and X. Li, Synergistic effect of electron-deficient Ru<sup>0</sup> and lewis acid sites on Ru/TiO<sub>2</sub> for efficient reductive amination of furfural via promoting Schiff base ammonolysis, *ACS Catal.*, 2025, **15**, 14575-14587.
9. T. Komanoya, T. Kinemura, Y. Kita, K. Kamata and M. Hara, Electronic effect of ruthenium nanoparticles on efficient reductive amination of carbonyl compounds, *J. Am. Chem. Soc.*, 2017, **139**, 11493-11499.
10. C. Dong, H. Wang, H. Du, J. Peng, Y. Cai, S. Guo, J. Zhang, C. Samart and M. Ding, Ru/HZSM-5 as an efficient and recyclable catalyst for reductive amination of furfural to furfurylamine, *Mol. Catal.*, 2020, **482**, 110755.

11. C. Xie, J. Song, M. Hua, Y. Hu, X. Huang, H. Wu, G. Yang and B. Han, Ambient-temperature synthesis of primary amines via reductive amination of carbonyl compounds, *ACS Catal.*, 2020, **10**, 7763-7772.
12. K. Saini, S. Arulananda Babu and S. Saravanamurugan, Surface acidic species-driven reductive amination of furfural with Ru/T-ZrO<sub>2</sub>, *ChemSusChem*, 2024, **18**, e202401277.
13. Z. Gao, X. Zhao, X. Li, H. Wu, M. Gao, Q. Wang, D. Li and J. J. C. E. S. Feng, Rational regulation of spatially adjacent Al<sub>4</sub>c and Al<sub>6</sub>c sites assisted Ru catalysts for low-NH<sub>3</sub> furfural tandem reductive amination, *Chem. Eng. Sci.*, 2022, **258**, 117777.
14. H. Wang, Y. Zhang, D. Luo, H. Wang, Y. He, F. Wang and X. Wen, Active metal dependent side reactions for the reductive amination of furfural, *Mol. Catal.*, 2023, **536**, 112914.
15. G. Xu, Z. Tu, X. Hu, X. Zhang and Y. Wu, Supported Ruthenium catalysts with electronic effect and acidity-basicity for efficient reductive amination of biomass-based carbonyl compounds, *Chem. Eng. J.*, 2024, **481**, 10.
16. Y. Wu, D. Xu, Y. Xu, X. Tian and M. Ding, Ru clusters anchored on N-doped porous carbon-alumina matrix as efficient catalyst toward primary amines via reductive amination, *Appl. Catal. B Environ. Energy*, 2024, **343**, 123462-123471.
17. H. Gong, L. Wei, Q. Li, J. Zhang, F. Wang, J. Ren and X.-L. Shi, Electron-rich Ru supported on N-doped coffee biochar for selective reductive amination of furfural to furfurylamine, *Langmuir*, 2024, **40**, 8950-8960.
18. D. Deng, Y. Kita, K. Kamata and M. Hara, Low-Temperature Reductive amination of carbonyl compounds over Ru deposited on Nb<sub>2</sub>O<sub>5</sub>·nH<sub>2</sub>O, *ACS Sustainable Chem. Eng.*, 2018, **7**, 4692-4698.
19. M. Ronda-Leal, C. Espro, N. Lazaro, M. Selva, A. Perosa, S. M. Osman, A. Pineda, R. Luque and D. Rodríguez-Padrón, Efficient and stable titania-based nanocatalytic materials for the reductive amination of furfural, *Mater. Today Chem.*, 2022, **24**, 100873.
20. Z. Wang, Y. Zheng, J. Feng, W. Zhang and Q. Gao, Promoting amination of furfural to furfurylamine by metal-support interactions on Pd/MoO<sub>3-x</sub> catalysts, *Chem.-Eur. J.*, 2023, **29**, e202300947.

21. X. Jv, S. Sun, Q. Zhang, M. Du, L. Wang and B. Wang, Efficient and mild reductive amination of carbonyl compounds catalyzed by dual-function palladium nanoparticles, *ACS Sustain. Chem. Eng.*, 2019, **8**, 1618-1626.
22. C. Dong, Y. Wu, H. Wang, J. Peng, Y. Li, C. Samart and M. Ding, Facile and Efficient Synthesis of Primary Amines via Reductive Amination over a Ni/Al<sub>2</sub>O<sub>3</sub> Catalyst, *ACS Sustain. Chem. Eng.*, 2021, **9**, 7318-7327.
23. Y. Yang, L. Zhou, X. Wang, L. Zhang, H. Cheng and F. Zhao, Catalytic reductive amination of furfural to furfurylamine on robust ultra-small Ni nanoparticles, *Nano Res.*, 2022, **16**, 3719-3729.
24. K. Zhou, B. Chen, X. Zhou, S. Kang, Y. Xu and J. Wei, Selective Synthesis of Furfurylamine by Reductive Amination of Furfural over Raney Cobalt, *ChemCatChem*, 2019, **11**, 5562-5569.
25. Y. Wei, Z. Sun, Q. Li, D. Wu, J. Wang, Y. Zhang, C. C. Xu and R. Nie, Efficient reductive amination of furfural to furfurylamine promoted synergistically by surface Co<sup>0</sup> and oxygen-vacant CoOx, *Fuel*, 2024, **369**, 131703.
